# Supplementary material for: Genome-Wide Identification and Characterization of WRKY Transcription Factors in Betula platyphylla Suk. and Their Responses to Abiotic Stresses
Source: MDPI journal article supplement (doi:10.3390/ijms241915000), 2023-10-08
Supplement: s1 [file s1]

|          |               |           |                |                 |            |               |             |        |           |
|----------|---------------|-----------|----------------|-----------------|------------|---------------|-------------|--------|-----------|
|          | 10            | 20        | 30             | 40              | 50         | 60            | 70          | 80     |           |
| BpWRKY18 |               |           |                | MVLLQVIEGE      |            | KEKRETYNGADV  | DYKAP       |        | VSVQTS    |
| BpWRKY23 | ---           | MAGIDDDNA | AIIGDWVPPTPNRT | FFSAMLDDIGSRPLS | PPSSNTTE   | LFILGP        | EPMLSGNTNVN | NNNGT  | S         |
| BpWRKY36 |               |           | MAQTQSSSTELSE  | RLSSSGDDPG      | GRPGTG     | SSNSAARYKL    | MSPAKLPI    | SRAPCI | TIPPGLSPT |
| BpWRKY38 |               |           | MAEREEPPPRST   | SSSSSQASKSMAY   | NLPSRPTISL | PPRSMETVFN    | GGGGPAM     | NGLGF  | SPG       |
| BpWRKY46 |               |           | MAKKDDYGRVSAP  |                 |            | APARPTITLPPR  | PSMETLFT    | GGAG   | ASPG      |
| BpWRKY51 | MASSSGSLDTSAN | SHPT      | SFTFSTHFFMST   | SFSDLLASS       | YDDE       | SNNNVNTNTQNKQ | FRGLSDR     |        | IADR      |
| BpWRKY54 |               |           |                | MVTSG           |            |               |             |        |           |
| BpWRKY55 |               |           | MSENESEF       | ALRVENPKPP      | E          | E.EE.EDEEEE   | EEES        | SED    |           |
| BpWRKY61 |               |           |                | TSFTDLLSG       |            | NDNMDSSMAIS   | WGYSDQ      |        | KTDRIG    |
| BpWRKY62 |               |           | MDIKEAERIVIAK  | AP              |            | VASRPTCSS     |             |        |           |

|          |         |          |       |     |                |                |            |           |           |
|----------|---------|----------|-------|-----|----------------|----------------|------------|-----------|-----------|
|          | 90      | 100      | 110   | 120 | 130            | 140            | 150        | 160       |           |
| BpWRKY18 |         | MDFEFPT  | TELP  |     | KANATKNC       | AVDLSAEVK      |            |           | V         |
| BpWRKY23 |         | LS       | DKF   | D   | DSFSEHKSSSRAGL | VERMAARAG      | FNAPRLNTQG | RSADMSSNS | DIRSPYLTI |
| BpWRKY36 | SFLES   | PVLLSNN  |       |     |                | MKAEPSP        | TGSFLK     | TQG       | HGHGGSAP  |
| BpWRKY38 | PMTLLSS | FSD      |       |     | TD             | CRSFSQLLAGAM   |            | PAAIP     | SQQRQ     |
| BpWRKY46 | PMTLVSS | FSDN     |       |     | YADG           | DSRSFSQLLAGAMA |            | PLARPS    | FAENSTD   |
| BpWRKY51 |         | SGVPKFKS | ITP   |     |                | PSLP           | SPP        | SP        | SYFAIP    |
| BpWRKY54 |         |          |       |     |                | EC             | PDEVAS     | DELQQR    | QIAGD     |
| BpWRKY55 |         |          |       |     |                | EEEEEE         | DEVGGLQ    | VG        | FRGS      |
| BpWRKY61 |         | DEL      | PKFKS | QP  |                | PSLP           | FSPAP      | SP        | SYFAIS    |
| BpWRKY62 |         |          |       |     |                | FRSFS          | ELLA       | GATD      | ASPSN     |

|          |     |          |             |            |            |           |          |           |         |
|----------|-----|----------|-------------|------------|------------|-----------|----------|-----------|---------|
|          | 170 | 180      | 190         | 200        | 210        | 220       | 230      | 240       |         |
| BpWRKY18 | FKN |          | MGMNGC      |            | IDLQIHSD   | LIAND     |          |           |         |
| BpWRKY23 |     | LSNSLA   | AQSPPTTCKFP |            | FIP        | D         | RSMT     | ISEAP     | RSK     |
| BpWRKY36 |     | SERN     | SNCFEFKPI   | ATSNMVPADL | HWRI       | EQSM      | VQQR     | QPQAFVSSP |         |
| BpWRKY38 |     | GAGDDDFR |             | FRQNR      | PPIFTVPQ   | LSPAGL    | DSPGLFSP | GGG       |         |
| BpWRKY46 |     | GSGFKQSR | PMNLMVARSP  | MTIPP      | LSPSGL     | NSPGFFPPQ | GDMG     | GIWWQM    | VSLRNA  |
| BpWRKY51 |     | LL       | SCN         | ILPSP      | TGTFPSQGF  | EWKS      | SCNNRM   | NVKQE     | KNYSDFS |
| BpWRKY54 |     | SPQNP    |             |            |            | DYEIRAKQL | Q        | ANMPSS    |         |
| BpWRKY55 |     | QLSE     | ENGLQG      | NSTSKLV    | GGAELKDK   | GESQ      | IVVLAS   | VTAQPV    | AQT     |
| BpWRKY61 |     | PSHF     | SNLASPTT    | CAFAGEAF   | NRMS       | SAENQ     | GVKGEEK  | FSSDFS    |         |
| BpWRKY62 |     | RPK      | TVRFKP      | MVNF       | APAGLVSSQA | EISG      | TAVCNSSD | KVSKF     | S       |

|          |        |        |        |          |              |        |       |            |                |
|----------|--------|--------|--------|----------|--------------|--------|-------|------------|----------------|
|          | 250    | 260    | 270    | 280      | 290          | 300    | 310   | 320        |                |
| BpWRKY18 |        |        |        |          |              |        | QKSLP |            |                |
| BpWRKY23 |        |        |        | TTS      | FAFRP        | VAEPGS | SFFFG | ASSK       | MTPTTLP        |
| BpWRKY36 |        |        |        |          |              |        | SVK   | EVAVSSSELS | LSA            |
| BpWRKY38 |        |        |        |          |              |        |       | PFGM       | THQQ           |
| BpWRKY46 | IDFEVQ | ILLTNN | AKDIDQ | IQFPLDSQ | DRLSHFFKLCQI | Y      | IVP   | ISKELE     | SWKDV          |
| BpWRKY51 |        |        |        |          |              |        | FRT   | NRP        | LSSSTNFQSS     |
| BpWRKY54 |        |        |        |          |              |        |       | V          | EKSSQVPDAA     |
| BpWRKY55 |        |        |        |          |              |        |       | KNQFQFS    | VCPTSSSEL      |
| BpWRKY61 |        |        |        |          |              |        |       | FQP        | TKPAAISSTVFQSS |
| BpWRKY62 |        |        |        |          |              |        |       | KSTV       | LYKPLAKLVSKT   |

|          |     |            |         |          |              |             |                |                |                       |
|----------|-----|------------|---------|----------|--------------|-------------|----------------|----------------|-----------------------|
|          | 330 | 340        | 350     | 360      | 370          | 380         | 390            | 400            |                       |
| BpWRKY18 |     |            |         |          |              | KGPI        | HGEDVETN       | HLLEGDLKGSYPST | GTVR                  |
| BpWRKY23 | SLQ | SVEPTKV    | QTQNRSS | LPQADF   | SRSC         | TEKDNG      | ANTV           | LADQRAYDAVG    | GSTE                  |
| BpWRKY36 | PVN | MVTSG      |         |          |              | ASAPTE      | VDSDEL         | NNR            | TSNTGFQTSQS           |
| BpWRKY38 | ALA | QVTAHAAQAN | SHMHV   | EPHYSSS  | ISAAPATSLT   | QLP         | AFSTNATAH      | QQVP           | SVPNSSVAMNESSDVSHSDQR |
| BpWRKY46 | ALA | QVTAQAAL   | AQSHIHM | QTEYQ    | PSSVAAPT     | ESLTHN      | PSYTLNCASQQQMA | STSDPRSSM      | MESSEASHADRKYQPPS     |
| BpWRKY51 | NTI | QTSQ       |         | QQCAWTFQ | EPTRQDD      | FSSGKSMVKTE | FGSMQSYSP      | EFAP           | IQNTQTQD              |
| BpWRKY54 | VPT | MQSDQ      |         |          |              | EGRTSS      | IVSE           | LS             | QAP                   |
| BpWRKY55 | SPT | SVTQP      |         |          |              | ISSLP       | SPPTLPEQRL     | SQAKSNNE       | ECVPKKDQQNS           |
| BpWRKY61 | SNM | SAEES      | FKRQ    | QGAWN    | FSKPTD       | QTEFSM      | EKVEVKA        | E              | FAP                   |
| BpWRKY62 | TVS | LLANM      | GNFNTS  | QQQLQPSV | EASVQYPNQDKQ | NFRSQIT     | SNLHQNIP       | SHVETNQT       | GPPKIASQN             |

|          |     |         |       |             |         |       |          |          |          |
|----------|-----|---------|-------|-------------|---------|-------|----------|----------|----------|
|          | 410 | 420     | 430   | 440         | 450     | 460   | 470      | 480      |          |
| BpWRKY18 |     | AL      | EDRYN | WRKYGQKQVKG | SEYPRSY | YKCTH | ANCQVKKK | VERSHDGQ | ITEITYKG |
| BpWRKY23 | G   | GAQS    |       | G           |         |       | NS       | P        |          |
| BpWRKY36 |     | PSD     | G     |             |         |       | P        | E        | LF       |
| BpWRKY38 | TV  | DNPAAGF |       |             |         |       | P        | P        |          |

[illegible]

|          | 890                                                                 | 900 | 910 |  |
|----------|---------------------------------------------------------------------|-----|-----|--|
| BpWRKY18 | E Q K D D S L Y D A C L P T V D H G N V T S S L Y H Q V M G R F P P | 599 |     |  |
| BpWRKY23 | . P . A E P M S E P G . N L S N G T . V . Q H I . S . L . L G P Q M | 752 |     |  |
| BpWRKY36 | N G S Y P F P Q N M G K I L T G P                                   | 575 |     |  |
| BpWRKY38 |                                                                     | 540 |     |  |
| BpWRKY46 |                                                                     | 615 |     |  |
| BpWRKY51 | . P R . . M F L E S L . A                                           | 598 |     |  |
| BpWRKY54 | . G S . T V C L . M V G C S                                         | 456 |     |  |
| BpWRKY55 | M E S A R T . L S I G F E . K P C                                   | 503 |     |  |
| BpWRKY61 | . P . N T F F . S F . S E D Y                                       | 550 |     |  |
| BpWRKY62 |                                                                     | 477 |     |  |
