# Supplementary material for: Genome-Wide Identification and Characterization of WRKY Transcription Factors in Betula platyphylla Suk. and Their Responses to Abiotic Stresses
Source: MDPI journal article supplement (doi:10.3390/ijms241915000), 2023-10-08
Supplement: s1 [file s1]

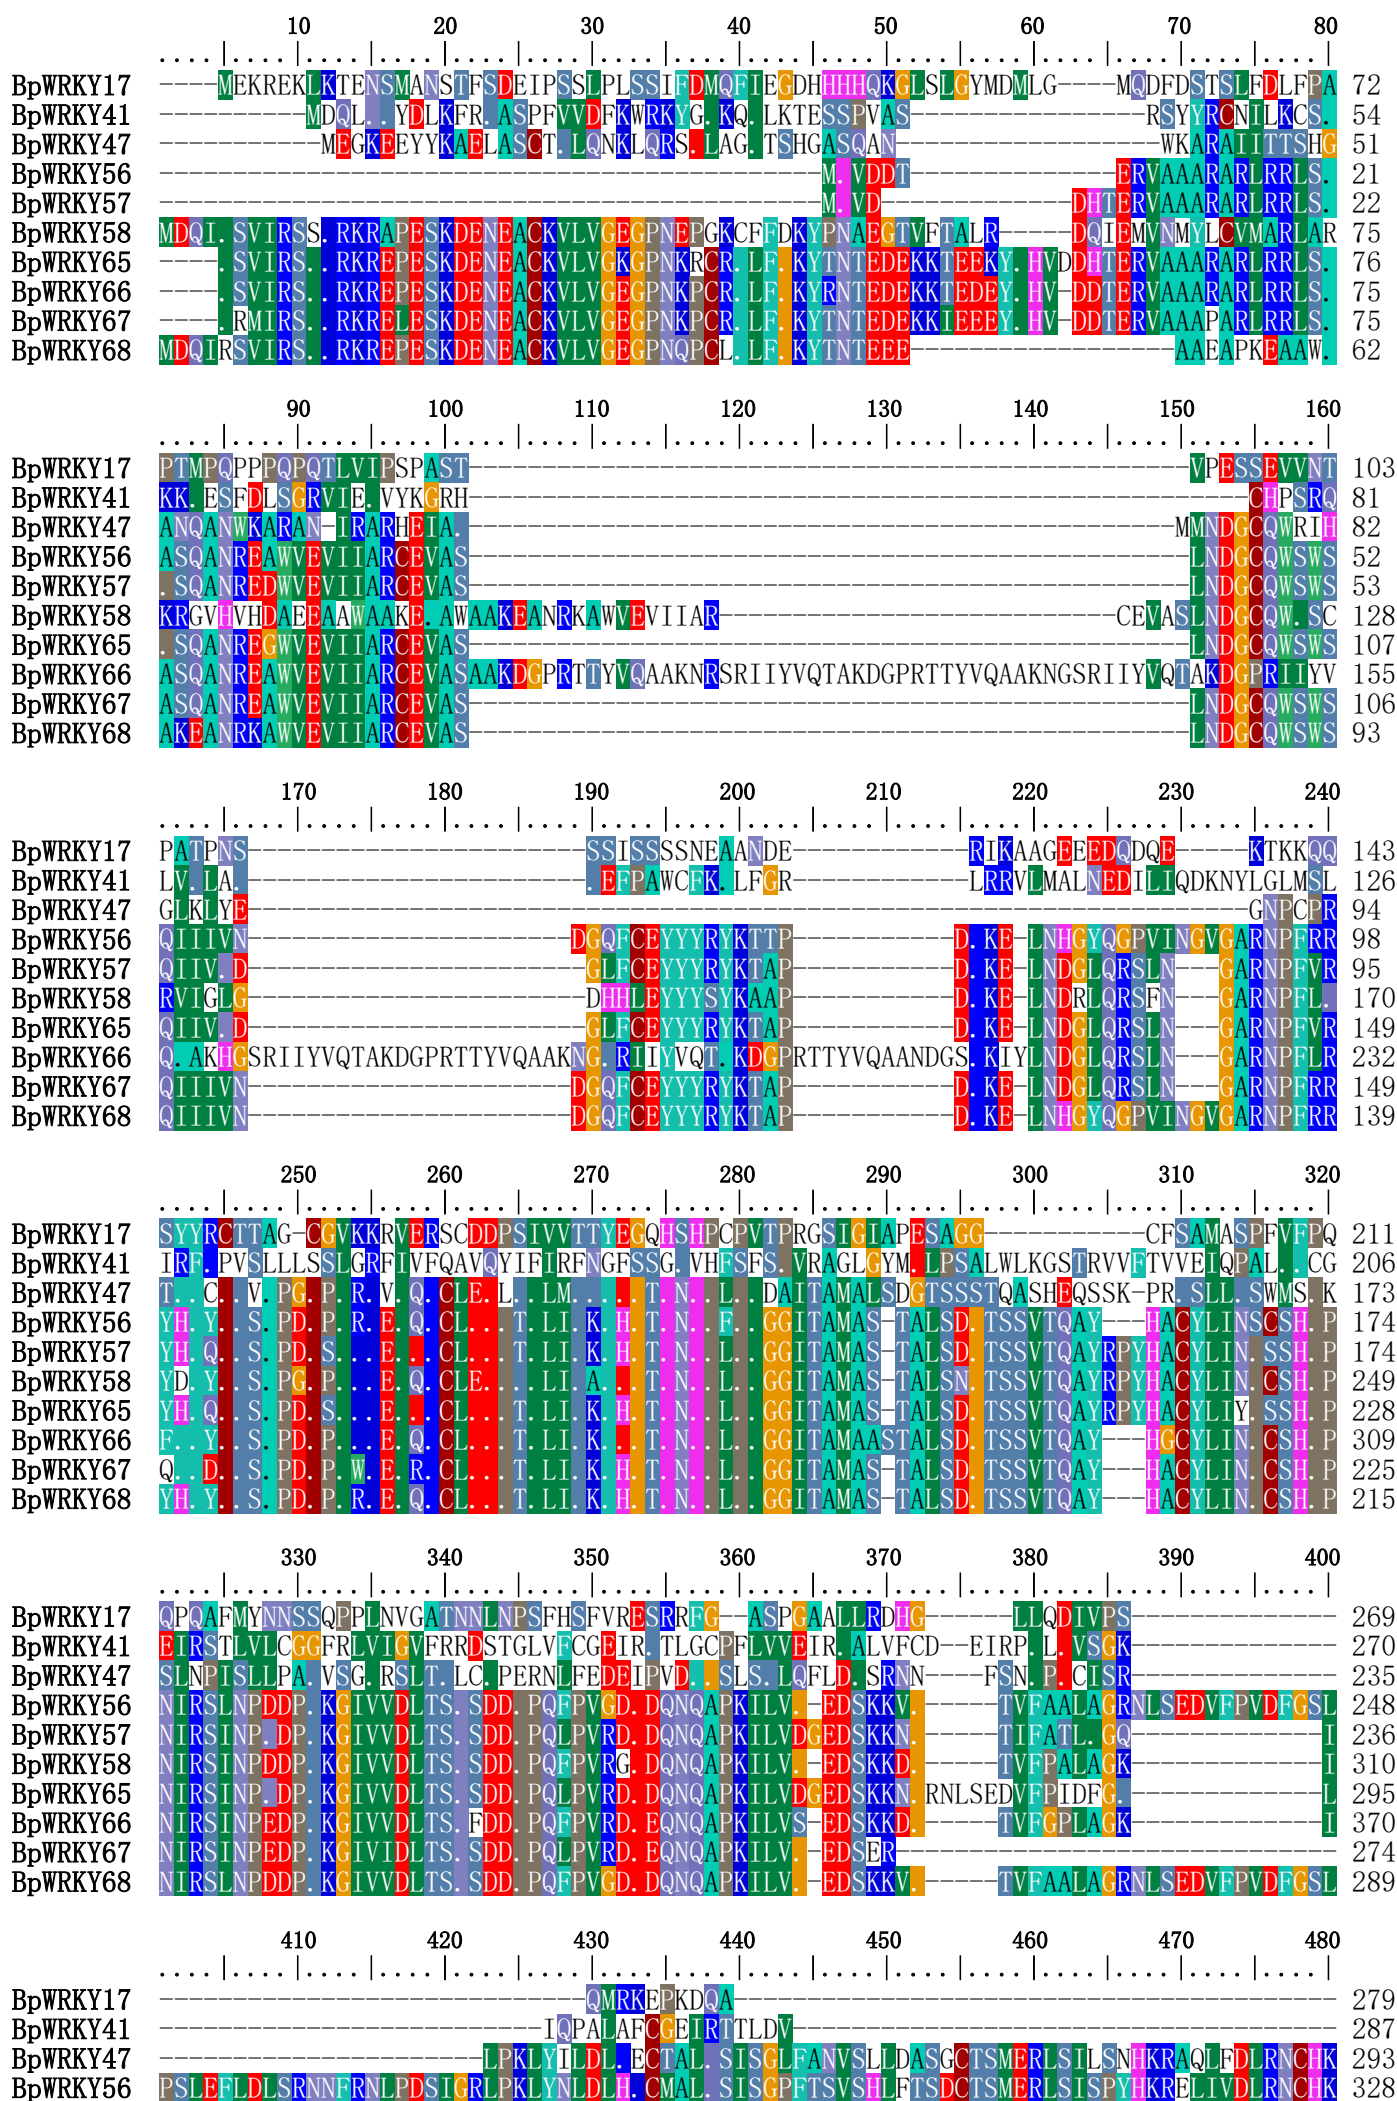

BpWRKY57 ET HTNT 242  
 BpWRKY58 EMVRCMHM HMNLCVVGRLRVKS 332  
 BpWRKY65 PSLEFLNLSRNNFRNLPDSIGRLPKLYNLDLH.CLAL.SISGPFASISHL.TSDCTSMERLSISPYHKKGLVVDLRNCHK 375  
 BpWRKY66 EMVRCMHM HMNLCVVGRLRVKS 392  
 BpWRKY67 RYCIRL.TRR 283  
 BpWRKY68 PSLEFLDLSRNNFRNLPDSIGRLPKLYKLDLH.CMAL.SISG 331

BpWRKY17 279  
 BpWRKY41 287  
 BpWRKY47 373  
 BpWRKY56 398  
 BpWRKY57 242  
 BpWRKY58 332  
 BpWRKY65 451  
 BpWRKY66 392  
 BpWRKY67 283  
 BpWRKY68 384

BpWRKY17 279  
 BpWRKY41 287  
 BpWRKY47 442  
 BpWRKY56 478  
 BpWRKY57 242  
 BpWRKY58 332  
 BpWRKY65 530  
 BpWRKY66 392  
 BpWRKY67 283  
 BpWRKY68 463

BpWRKY17 279  
 BpWRKY41 287  
 BpWRKY47 494  
 BpWRKY56 534  
 BpWRKY57 242  
 BpWRKY58 332  
 BpWRKY65 586  
 BpWRKY66 392  
 BpWRKY67 283  
 BpWRKY68 519
