# Supplementary material for: Genome-Wide Identification and Characterization of WRKY Transcription Factors in Betula platyphylla Suk. and Their Responses to Abiotic Stresses
Source: MDPI journal article supplement (doi:10.3390/ijms241915000), 2023-10-08
Supplement: s1 [file s1]

|          |                                           |     |
|----------|-------------------------------------------|-----|
| BpWRKY39 | .E.DGNESTAVEINKVQ.LA.E                    | 23  |
| BpWRKY40 |                                           | 1   |
| BpWRKY42 | MGREREREIEIHKQEEEEEQEEDDKTLPN             | 29  |
| BpWRKY43 |                                           | 1   |
| BpWRKY44 |                                           | 1   |
| BpWRKY45 | MLKMPCSSSAVTADENSF.E.IGHESQESSQVQSRVL.EIG | 44  |
| BpWRKY48 |                                           | 12  |
| BpWRKY49 | MEEIISLLIQQGCKARE.ES..PNLADKP.MLS         | 34  |
| BpWRKY50 |                                           | 19  |
| BpWRKY52 | WKLAMDAALNRSPPPTIQFPLN.NF.HHRQDSPP.SDDDK  | 103 |
| BpWRKY53 | WKLAMDAALNRSPPPTIQFPLN.NF.HHRQDSPP.SDDDK  | 103 |
| BpWRKY59 | MKIMDQBERGAPNYE.QVSFSNT.AIHEMG            | 31  |
| BpWRKY60 |                                           | 1   |
| BpWRKY64 | MEVMASTWSDVSEDD                           | 16  |

|          |                                                                                 |     |     |     |     |     |     |     |  |
|----------|---------------------------------------------------------------------------------|-----|-----|-----|-----|-----|-----|-----|--|
|          | 170                                                                             | 180 | 190 | 200 | 210 | 220 | 230 | 240 |  |
| BpWRKY1  | YEEAPKREFVRDFAQVDDGKAPVKFEAAGLAGELNRMSSSENKKLTEMALHLFED                         | 77  |     |     |     |     |     |     |  |
| BpWRKY2  | PMTSHSSK.IHHL.DMEPHTSNCQ.KVET.KAD.KSLLK.E.S.RF.VEVMKSK                          | 75  |     |     |     |     |     |     |  |
| BpWRKY5  | PPSNISGSSAYNSQGFDPSSYISFTESLQAP.DYNSLASAFG.SPSSSE                               | 69  |     |     |     |     |     |     |  |
| BpWRKY8  | SGCTNEAPTTFADPESIFAPLCAVEDHDLRLIFPEISDT                                         | 50  |     |     |     |     |     |     |  |
| BpWRKY10 |                                                                                 | 1   |     |     |     |     |     |     |  |
| BpWRKY11 | KRYEEETAI.DDQLQSARA.MGEVRE.QR.KKD.DRMVK                                         | 60  |     |     |     |     |     |     |  |
| BpWRKY12 | PRKATEELIQGRQFNQLRG.LGK.IGDDGSVPAKDLVLKI                                        | 53  |     |     |     |     |     |     |  |
| BpWRKY13 | NSSKGSTHTVNQKKVCADDDLHADELHVNEDSMFLVQLIDVQA..Q.HV..ER.RDRINQVNNN                | 134 |     |     |     |     |     |     |  |
| BpWRKY14 | NNHQPHDEQHHRKNGSSTQVSDPAGVNTGLHLRT.NSGMSRSANEKPNK.LIR.RE..E.LHQD.R..RSR.DLITKN  | 221 |     |     |     |     |     |     |  |
| BpWRKY15 | DHISDGYPFSGIFDFSSEGEKSSLGFMBLLGVQADYSSPSLFD.PSAPP                               | 70  |     |     |     |     |     |     |  |
| BpWRKY16 | MDPSL.PKPDQ.VS.ELKPE.QASKR                                                      | 26  |     |     |     |     |     |     |  |
| BpWRKY19 | MGFFSFPSNLSSLPPLGCHQSLKAFTTIPPSLSSDAP..NLITETLLSS.TTKQR                         | 54  |     |     |     |     |     |     |  |
| BpWRKY20 | MDSPVNPNNPNYMH..DS                                                              | 19  |     |     |     |     |     |     |  |
| BpWRKY21 | MDSPVNPNNPNYMH..DS                                                              | 19  |     |     |     |     |     |     |  |
| BpWRKY22 | MGFFSFPSNLSSLPPLGCHQSLKAFTTIPPSLSSDAP..NLITETLLSS.TTKQR                         | 69  |     |     |     |     |     |     |  |
| BpWRKY25 | MATT.DLEQTAIT.DLNQCK.L.KQLMNLHP..SHETREFLVEKILSC                                | 49  |     |     |     |     |     |     |  |
| BpWRKY26 | MEGQNQPPFLTSSLPPSS..SLHPPNN.DPEIDW                                              | 37  |     |     |     |     |     |     |  |
| BpWRKY27 | TATSSTTTATVVTNTTNNNTCFLANFHPNSCFSAFGG.QCGQLFSFPDPL.E                            | 70  |     |     |     |     |     |     |  |
| BpWRKY28 | LVRELLNDQSPFFVLPEKMMITTEPNTSALNEEAINRL                                          | 50  |     |     |     |     |     |     |  |
| BpWRKY29 | LVRELLDDQSPFFVSPKMMITTT.PNTSALNEEAINHL                                          | 55  |     |     |     |     |     |     |  |
| BpWRKY30 | DPFGYIRDPLLHHELDVSGSPGFFSSPSSGEMGRSSSVDDKAGGFSTTHVFEMKRPS.MLRMLQISPNAL          | 137 |     |     |     |     |     |     |  |
| BpWRKY31 | MSE.QSRRQ.MYDSF.LLT..SF.SP                                                      | 27  |     |     |     |     |     |     |  |
| BpWRKY32 | MDRRFINNHPTGTDDQEEEAATPQNGAESPPSI                                               | 36  |     |     |     |     |     |     |  |
| BpWRKY33 | VKKENSHGEEAPRPLGLDVNTGLHLTANTGSDQST.DGIGSS.AEDKRA.S.L.Q.QV..QH.N..QR.RD..GQVTNN | 170 |     |     |     |     |     |     |  |
| BpWRKY35 | SNHCQKFEKHPSNIDAGLK.LLDLNNVKQPVILSMVRVK.EQIKE..RN.KG..DRATKK                    | 88  |     |     |     |     |     |     |  |
| BpWRKY37 | WPLGPDSESVYFFSNDRESSILSEFGW.LHPEDPNRIQFDD.SDLAG                                 | 66  |     |     |     |     |     |     |  |
| BpWRKY39 | KNTKDL.LSTRQNQQDQKLAE.MGEVKE..ER.KML.GRIAK                                      | 67  |     |     |     |     |     |     |  |
| BpWRKY40 | MENYPIFSSSSSTPPASS.SLM.DHSIG                                                    | 29  |     |     |     |     |     |     |  |
| BpWRKY42 | DTEEVAEATAGEVDDASLLQGSLLQNMKTDK.LSV.QM.M..KE..RV.RKVVEQTIK                      | 90  |     |     |     |     |     |     |  |
| BpWRKY43 | MENYQMFFPASS.GQSNDYIP                                                           | 21  |     |     |     |     |     |     |  |
| BpWRKY44 | MRSHFKPGSSSSTGFVGIEDQRRQQQQQQN.PYQ                                              | 35  |     |     |     |     |     |     |  |
| BpWRKY45 | SLNRSSTSYEDLRN..E-VN.IESAKA.MGEVRE..ER.KV..EQIEK                                | 92  |     |     |     |     |     |     |  |
| BpWRKY48 | R.KVIKELVQGC.TQLKT.LHKTLDHGLSLAEELVSKI                                          | 53  |     |     |     |     |     |     |  |
| BpWRKY49 | KSC.EIINA.RSAKERLHSSQEAHDPHMFRLQQAETQI.TSLQGWKRPSAYS                            | 89  |     |     |     |     |     |     |  |
| BpWRKY50 | FFNNNPTQNPGGFEPMSFTDCLHGS.DYNTLSRAFDMSCSPS                                      | 62  |     |     |     |     |     |     |  |
| BpWRKY52 | VSTDNKDFDRPTSLQFNVNTGLNLLTTNTSSDQST.DGIGSPNVEDKRA.S.L.V.QA..E..KA..QR.K..NQVTNN | 183 |     |     |     |     |     |     |  |
| BpWRKY53 | VSTDNKDFDRPTSLQFNVNTGLNLLTTNTSSDQST.DGIGSPNVEDKRA.S.L.V.QA..E..KA..QR.K..NQVTNN | 183 |     |     |     |     |     |     |  |
| BpWRKY59 | FVQFEDNQVLSFLAPSQTSQMSQPLS.GGTTTTTATTGATSNTNP.SIGFS                             | 83  |     |     |     |     |     |     |  |
| BpWRKY60 | MSAGSNNYEPLDHFARQYVPDQSI.DL                                                     | 28  |     |     |     |     |     |     |  |
| BpWRKY64 | LVRELLDDQSPFFVLPEKMMITTTT.PNTSALNEEAINHL                                        | 56  |     |     |     |     |     |     |  |

|          |                                                                 |     |     |     |     |     |     |     |  |
|----------|-----------------------------------------------------------------|-----|-----|-----|-----|-----|-----|-----|--|
|          | 250                                                             | 260 | 270 | 280 | 290 | 300 | 310 | 320 |  |
| BpWRKY1  | YHALQTHLMGQGLANNNSQKEFTSRKRKAESDY                               | 112 |     |     |     |     |     |     |  |
| BpWRKY2  | CKI.EA..QETKAVGMDMI                                             | 96  |     |     |     |     |     |     |  |
| BpWRKY5  | VFSSENNPNYKPTIEVA                                               | 86  |     |     |     |     |     |     |  |
| BpWRKY8  | TTV.DELEN.YKPFYP                                                | 66  |     |     |     |     |     |     |  |
| BpWRKY10 | MKVETT                                                          | 6   |     |     |     |     |     |     |  |
| BpWRKY11 | .QT..MRFYDLYQGEGRNKHQIEEIPDHQFVSLSLGRLPSD-T.KDEKTNIN            | 115 |     |     |     |     |     |     |  |
| BpWRKY12 | LNSFTNT.SMLNSAES                                                | 69  |     |     |     |     |     |     |  |
| BpWRKY13 | .ND.KM..ATLLTSQH                                                | 172 |     |     |     |     |     |     |  |
| BpWRKY14 | .SE..GQ.LVA.QKQAQQNRQEQQVEPNGMSRSAQQFIDPRPSSAALDHVNNHNSVNSGDKTQ | 284 |     |     |     |     |     |     |  |
| BpWRKY15 | SVAPSSAPLP                                                      | 80  |     |     |     |     |     |     |  |
| BpWRKY16 | RKVV.KN                                                         | 33  |     |     |     |     |     |     |  |

| Protein  | Sequence                                                                       | Length |
|----------|--------------------------------------------------------------------------------|--------|
| BpWRKY19 | EDTTSDFR                                                                       | 62     |
| BpWRKY20 | DPFSSDFE                                                                       | 27     |
| BpWRKY21 | DPFSSDFE                                                                       | 27     |
| BpWRKY22 | EDTTSDFR                                                                       | 77     |
| BpWRKY25 | .EKALST.N                                                                      | 58     |
| BpWRKY26 | VSL.SAGQ                                                                       | 45     |
| BpWRKY27 | RNVFEELELYKPFPPK                                                               | 87     |
| BpWRKY28 | ISTVYSGPTIGDTENAE                                                              | 67     |
| BpWRKY29 | ISTVYSGPTIGDIENTA                                                              | 71     |
| BpWRKY30 | LASAAASPCASPVM.AS                                                              | 154    |
| BpWRKY31 | RSYEENER                                                                       | 35     |
| BpWRKY32 | FNDMKLASVS                                                                     | 46     |
| BpWRKY33 | .SV..M..VAF.QQQQ.HGADRTQEHEVVDQKGSEERKHEV.NSGGVVPRQFMDLPGGPAETDEVSHSSSEDRT---V | 246    |
| BpWRKY35 | .TD..SQ.LSA.QQPAA--HINNYLPKDERNEMDGLSQARRQSIEPVPSSST.ILDINEPSHSNDDKTQYER       | 158    |
| BpWRKY37 | SFG.PDNNTSNP.QGS                                                               | 83     |
| BpWRKY39 | .QS..M.FFDVLQQEEA---KSTDTISN---HPAKEEPLVSLSLGMTSTDDLAK.HDKNSMNLNNGGQEDE        | 134    |
| BpWRKY40 | .NEFGSK---                                                                     | 37     |
| BpWRKY42 | .D..MKFTTHQNNHE--KDPQIFLSLRGNDEA.QEQ.TVPEILGI                                  | 135    |
| BpWRKY43 | FSTKMES                                                                        | 29     |
| BpWRKY44 | QRQVLHQCEFR                                                                    | 47     |
| BpWRKY45 | .S..LRFFDITIKQESP---KKSTESSAPRLHDETDEPELVSLCLGRSPSDQ-P.KEKA..S---STNYE         | 156    |
| BpWRKY48 | LKSFTET.SALSSFES                                                               | 69     |
| BpWRKY49 | TQPIMDM.QM.LQADRS                                                              | 106    |
| BpWRKY50 | .QVIEDNLTVK---                                                                 | 73     |
| BpWRKY52 | .N..M.FVTI.QSQK---AKKG-TEENGKLVGKDMI VPRQLVDLRLAT.GADENSLSSSEGGK.SHIDR         | 250    |
| BpWRKY53 | .N..M.FVTI.QSQK---AKKG-TEENGKLVGKDMI VPRQLVDLRLAT.GADENSLSSSEGGK.SHIDR         | 250    |
| BpWRKY59 | HND.VLD.L.I.IRSEQ                                                              | 100    |
| BpWRKY60 | SDF.TDDQWDE                                                                    | 40     |
| BpWRKY64 | ISTVYSGPTIGDIENTA                                                              | 72     |

|          | 410             | 420            | 430          | 440       | 450               | 460        | 470                | 480     |     |
|----------|-----------------|----------------|--------------|-----------|-------------------|------------|--------------------|---------|-----|
| BpWRKY1  | IKTKASRVCVR     | DAS-DKSLITVK   | DGYQWRKY     | GQKVTRDNP | SPRAYFKCSFAP      | SCPVK      | KKVQRSAED          | PSMLV   | 210 |
| BpWRKY2  | -Y. TQ. IL. . . | SDQ. N. . V.   |              | K.        |                   |            | CL. . K. V. M      |         | 187 |
| BpWRKY5  | KGE. KQKEPRFAF  | MTKSEVDHLE.    | . R.         | AVKNS.    | Y. S. YR. TTQK    | G. .       | R. E. . FQ. .      | TVVI    | 219 |
| BpWRKY8  | RRISKKNQPKV     | QHVAGEGHGS.    | LWA.         | PIKGS.    | Y. S. YR. SSKG    | TAR        | Q. E. . NL. .      | GVFI    | 173 |
| BpWRKY10 | KGD. QIKKQRYAF  | QTRSQVDILD.    | . R.         | GVKNSK    | F. S. Y. TYKG     | N.         | QI. LTK. EEIV.     |         | 98  |
| BpWRKY11 | SQQNPVKKARV     | SVRARCETP. MN. | C.           | IAKETMPS. | ILSLYC. TLL       | RKKTVLIRPS | APPS. C. . .       | M. I. I | 257 |
| BpWRKY12 | RRGCYK. RRTSL   | TTK. TPTLID.   | HA.          | LILNAK    | Y. H. YR. THKYDQ  | G. QAA     | Q. . IQ. . A. HR   |         | 180 |
| BpWRKY13 | TLSSLI. KARVSV  | RARSDAYMIS.    | CH.          | MAKG.     | F. . YR. TMGS     | . R        | Q. . C. . R. I. I  |         | 285 |
| BpWRKY14 | PELVPI. KARVSV  | RARSEAPLIG.    | C.           | MAKG.     | F. . YR. TM. V    | G. . R     | Q. . V. . KTI. I   |         | 417 |
| BpWRKY15 | N-Q. RQ. EPRFAF | MTKSEVDHLE.    | . R.         | AVKNS.    | F. S. YR. TTTS    | N.         | R. E. . FT. . IV.  |         | 209 |
| BpWRKY16 | -VVTVRIGANV     | GKLKNEGPPS.    | FWS.         | PIKGS.    | Y. G. YR. TSKG    | SA.        | Q. E. CRT. A. . I  |         | 101 |
| BpWRKY19 | KARRKV. EPRFCFK | TMSDVDVLD.     | . K.         | VKNNTQ    | H.                |            |                    |         | 155 |
| BpWRKY20 | DIG. . .        | HRVAFRTKSQ     | LEIMD. . FK. | K. AVKNS. | N.                | WGG        |                    | AA      | 116 |
| BpWRKY21 | DIG. . .        | HRVAFRTKSQ     | LEIMD. . FK. | K. AVKNS. | N. N. Y. . SGG    | N. .       | R. E. ERD. . YVI   |         | 138 |
| BpWRKY22 | KARRKV. EPRFCFK | TMSDVDVLD.     | . K.         | VKNNTQ    | H.                |            |                    |         | 170 |
| BpWRKY25 | KTLPRTWTEQ.     | KVCSGTGLEGLD.  | . S.         | DILGAN    | F. G. YR. THRG    | QG. LAT    | L. . . D. . AI. E  |         | 161 |
| BpWRKY26 | GRM. KATRPRFAF  | QTRSADDILD.    | . R.         | AVKNSV    | Y. S. YR. THHT    | N. .       | Q. . LSK. T. IV.   |         | 154 |
| BpWRKY27 | PRS. RRKNLLKKV  | CQVPAEGLSS.    | VWA.         | PIKGS.    | Y. G. YR. SSKG    | LAR        | Q. E. NKS. G. FI   |         | 209 |
| BpWRKY28 | GLN. VENKYTKIK. | YAGNVMAD.      | . K.         | SIKNS.    | N. S. YR. TNPR    | SA.        | Q. EW. S. . ET. I  |         | 179 |
| BpWRKY29 | GLN. VENKYTKIK. | YG-NVMAD.      | . K.         | SIKNS.    | N. . . . TNPR     | SA.        | Q. E. . S. . ET. I |         | 161 |
| BpWRKY30 | K. VICIPAPAAA   | NSRPTGEVVPS.   | LWA.         | PIKGS.    | Y. G. YR. SSKG    | SAR        | Q. E. NRA. N. .    |         | 275 |
| BpWRKY31 | LRKPVRGIEEEQ.   | MDARLVLPE.     | . E.         | FI. NIG   | KF. S. . . QRSN   | SA.        | RAEW. S. . GT. R   |         | 107 |
| BpWRKY32 | -VPIKDVESRLK    | GESNTPPS.      | SWA.         | PIKGS.    | Y. G. YR. SSKG    | AR         | Q. E. RA. T. I.    |         | 134 |
| BpWRKY33 | AAEATM. KARVSV  | RARSEAPMIS.    | C.           | MAKG.     | C. . YR. TM. V    | G. . R     | Q. . C. . R. I. I  |         | 368 |
| BpWRKY35 | -VSCKKARVSI     | RARSDAPLMM.    | C.           | MAKG.     | C. . YR. TMSI     | G. . R     | Q. . C. . M. I. T  |         | 276 |
| BpWRKY37 | G-Q. RI. QPRFAF | MTKSEVDHLE.    | . R.         | AVKNS.    | F. S. YR. TNSR    | T. .       | R. E. . S. . TIVI  |         | 204 |
| BpWRKY39 | LQQNPLKKARV     | SVRARCETP. MN. | C.           | IAKG.     | C. G. YR. TVSS    | . R        | Q. . CVD. M. I. I  |         | 267 |
| BpWRKY40 | KGE. KI. KPRYAF | QTRSQVDILD.    | . R.         | AVKN. K   | F. S. YR. THQG    | N. .       | Q. . LTK. EGIVL    |         | 147 |
| BpWRKY42 | SASQ. N. KARVSV | RARCEAA. MN.   | C.           | IAKG.     | C. . YR. TV. G    | . R        | Q. . CL. M. I. I   |         | 277 |
| BpWRKY43 | KVE. KI. KPRHAF | QTRSQVDILD.    | . R.         | AVKN. K   | F. S. YR. TYQG    | N. .       | Q. . LTK. EGIV.    |         | 143 |
| BpWRKY44 | RSR. RKSQKK.    | VCHVTAENLSA.   | VWA.         | PIKGS.    | Y. N. YR. SSKG    | AAR        | Q. E. . NIE. N. FI |         | 135 |
| BpWRKY45 | SQQNHVKRARV     | SVRARCETP. MN. | C.           | IAKG.     | C. . YR. TV. E    | . R        | Q. . CY. K. I. I   |         | 284 |
| BpWRKY48 | RRGCYR. RKTHTT  | TITLSPTVEN.    | HA.          | EILNAK    | H. S. . R. TRKYDQ | G. RAT     | Q. . MEGN. Q. FQ   |         | 181 |
| BpWRKY49 | DDGERRTEI. AAP  | RIGNTDIPPE.    | . T.         | EILGSK    | F. G. YR. THQR    | LYQ. A.    | Q. . LDD. . YKFE   |         | 235 |
| BpWRKY50 | -E. RQ. EPRFAF  | LTKSQIDHLE.    | . R.         | AVKNS.    | Y. S. YR. TSQK    | N.         | R. E. CFQ. . VVI   |         | 196 |
| BpWRKY52 | QTEATM. KARVSV  | RARSEAAMIT.    | C.           | MAKG.     | C. . YR. TM. N    | G. . R     | Q. . C. . RTI. I   |         | 380 |
| BpWRKY53 | QTEATM. KARVSV  | RARSEAAMIT.    | C.           | MAKG.     | C. . YR. TM. N    | G. . R     | Q. . C. . RTI. I   |         | 368 |
| BpWRKY59 | KVRRKL. EPRFCFK | QTRSDVDVLD.    | . K.         | VKNSL     | H. SVIRGRDW       | WLP        | A. SEKMVVFQ. L. S  |         | 215 |
| BpWRKY60 | HERREGLRERVA    | FRTISEVEVLD.   | . FK.        | K. MVKNS. | N. N. YR. VDG     | . . .      | R. E. DN. . RCVI   |         | 154 |
| BpWRKY64 | GLN. VENKYTKIK. | YG-NVMAD.      | . K.         | SIKNS.    | N. S. YR. TNPR    | SA.        | Q. E. . S. . ET. I |         | 166 |

|          | 490              | 500             | 510           | 520         | 530 | 540 | 550 | 560 |     |
|----------|------------------|-----------------|---------------|-------------|-----|-----|-----|-----|-----|
| BpWRKY1  | AIYEGEHNMNPS     | QAEIFSFA        | PSQCAN        |             |     |     |     |     | 236 |
| BpWRKY2  | . T. D. K. . .   | DVHG            | -T. LGDSSSS   |             |     |     |     |     | 209 |
| BpWRKY5  | TT. . . Q. . .   | PV. ATLR        |               |             |     |     |     |     | 235 |
| BpWRKY8  | VT. TS. . .      | TH. TRNSLAGS    | RRSKFP        | SPE         |     |     |     |     | 203 |
| BpWRKY10 | TT. . . M. T. .  | PLNKTTA         |               |             |     |     |     |     | 114 |
| BpWRKY11 | TT. . . T. . .   | PL. MS. TGMAS   | TTSA. ASMLLSG | SSSSGQ      |     |     |     |     | 328 |
| BpWRKY12 | TT. I. Q. TCR    | TFPK. PELILD.   | SP-TDSHF      |             |     |     |     |     | 209 |
| BpWRKY13 | TT. . . R. . .   | PL. PA. . AMVST | TTA. ASMLLSG  | PMPSSAD     |     |     |     |     | 338 |
| BpWRKY14 | TT. . . N. . .   | PL. PA. TAMANT  | TTSA. AAMLLS  | GLRIQHG     |     |     |     |     | 455 |
| BpWRKY15 | TT. . . Q. I. .  | PS. VMPR        |               |             |     |     |     |     | 225 |
| BpWRKY16 | IT. TSS. . .     | PG. DLSTTN      | LIRP          | EE          |     |     |     |     | 126 |
| BpWRKY19 | -                | LERFKSQ         | FNL           |             |     |     |     |     | 166 |
| BpWRKY20 | KTTSFIEFAE       | SDCFRL          |               |             |     |     |     |     | 132 |
| BpWRKY21 | TT. . . V. . .   | ES. CVVY        |               |             |     |     |     |     | 154 |
| BpWRKY22 | -                | LERFKSQ         | FNL           |             |     |     |     |     | 181 |
| BpWRKY25 | VT. R. R. TCSQA. | RSNVASG.        | RLITEKKN      | HDDQKK      |     |     |     |     | 197 |
| BpWRKY26 | TT. . . I. . .   | PCEKLM          |               |             |     |     |     |     | 169 |
| BpWRKY27 | VT. TA. . .      | PA. THNSLAG     | STRQK         | LTPQTATAGDS |     |     |     |     | 246 |
| BpWRKY28 | IT. VRR          | APLTLCLP        | ILFT          |             |     |     |     |     | 197 |
| BpWRKY29 | IT. . . .        | LHLHF. YPY.     | LHD. NYVDPA   |             |     |     |     |     | 187 |
| BpWRKY30 | IT. TS. . .      | PW. T. RNALAG   | STRSQPSKNN    |             |     |     |     |     | 306 |
| BpWRKY31 | VV. . . V. T. .  | GS. AS          | ES            |             |     |     |     |     | 123 |
| BpWRKY32 | VT. SC. . .      | PL. ASRNHHN     | GHNQSTTPK     | PEKPEPVPE   |     |     |     |     | 173 |
| BpWRKY33 | TT. . . N. . .   | PL. PA. MAMAS   | TAA. ASMLLSG  | SMSSADGIM   |     |     |     |     | 426 |



|          |                                                   |                  |                                         |                  |     |
|----------|---------------------------------------------------|------------------|-----------------------------------------|------------------|-----|
| BpWRKY35 | ST. . . N . . . PL. PP. TF                        | MASTTSA. VSMLLSG | STT                                     | SN               | 313 |
| BpWRKY37 | TT. . . Q . . . C . . . HTV                       | GFPR             |                                         |                  | 220 |
| BpWRKY39 | TT. . . T . . . PL. IS. TAMASTTSA. ASML           | QSRSSSSS         | QLGGLGTSATAPLSTSTANNLHGFNFSTVSQNSRPPQFY | IPNS             | 347 |
| BpWRKY40 | TT. . . M . . . S . . . PIEKST                    |                  |                                         |                  | 162 |
| BpWRKY42 | TT. . . T . . . PL. VG. TAMASTASA. SFMLLD         | SSNP             | TS                                      | SFTQAS           | 324 |
| BpWRKY43 | TT. . . V . . . T . . . PIEKPT                    |                  |                                         |                  | 158 |
| BpWRKY44 | VT. T. . . T . . . PR. THRNSLAGSTRN               | KCSAPHKS         | SIDKENSASLS                             |                  | 186 |
| BpWRKY45 | TT. . . T . . . PL. VS. AAMASTTSA. ASMLLS         | GSSMS            | QPGLG                                   |                  | 358 |
| BpWRKY48 | TT. I. H. TCREILKTPQIITE. HAWELTNFF               |                  |                                         |                  | 212 |
| BpWRKY49 | VT. R. D. TCHMS. T. PSIPP.                        |                  |                                         |                  | 256 |
| BpWRKY50 | TT. . . Q . . . HY. ATLR                          |                  |                                         |                  | 212 |
| BpWRKY52 | TT. . . N . . . S . . . PL. PN. MAMASTTSS. AKMLLS | GSMSS            | ADGLM                                   |                  | 438 |
| BpWRKY53 |                                                   | NTPAMLLKHG       |                                         | NSNFLTRTLLPCSSSM | 384 |
| BpWRKY59 | CVNL. . . KDMSLWLP. KN                            |                  |                                         | NNLSLS           | 232 |
| BpWRKY60 | TT. . . V . . . QSSF                              |                  |                                         |                  | 167 |
| BpWRKY64 | IT. . . . . LHLHF. YPY. LHD. NQYVDPA              |                  |                                         |                  | 192 |

|          | 570          | 580                             | 590                      | 600              | 610                | 620                      | 630                 | 640                          |      |     |
|----------|--------------|---------------------------------|--------------------------|------------------|--------------------|--------------------------|---------------------|------------------------------|------|-----|
| BpWRKY1  | ---          | LGSVHLSSSMRSSAPRV               | TLDLI                    | QP               |                    | ALCGAKN                  | SIQED               | DESPRA                       | 278  |     |
| BpWRKY2  | ---          | SDT. ARG. MANIIS. PRMANNN.      |                          |                  |                    | F. QPMALDL               | LSGPHQEN. R         |                              | 253  |     |
| BpWRKY5  | -            | GNAA. MFPP. MFTPPTGGGP. SFP     |                          |                  |                    | HHHQDLF                  | FRWR                |                              | 270  |     |
| BpWRKY8  | -            | KKGNF. -PTTPL. AAAI             | EDEFVQSHAS               |                  | GKNHEEEE           | MVQGNVDQGNVISMPDNI       | ILDNEIFFP           | LED                          | 269  |     |
| BpWRKY10 | -            | DSFEQIFRQMQTYAPLYMK             |                          |                  |                    |                          |                     |                              | 133  |     |
| BpWRKY11 | SYSSSS. F    | PTITL                           | DLT. TSSSSSSSH. FNKF     | SSYYPRYN         |                    | YSPTSLNFSNSSD            | HQPNAISWGYAN        |                              | 394  |     |
| BpWRKY12 | -            | VLSFDNTFTNKHNPVHPFLSSSF. S      |                          | VKQEHKEEMP       | SD                 | DVTHNQSSSSDYL            | VSPD. TAFD.         |                              | 270  |     |
| BpWRKY13 | TLSTASAPF    | PTVTL                           | DLTDH. -HNS. NNLP        |                  |                    | QVFGQS. PNQS. YFGLYGSQGM | DL                  |                              | 391  |     |
| BpWRKY14 | NPI          | GCTISHHPRLDTE. QPMQPTTFPH       | RIPAVPSSA                |                  |                    | TIFPL. H. FQHLG          | HPVYSF. SS          |                              | 517  |     |
| BpWRKY15 | -            | QILA. APPD. GFSGGR. ASGFAMP. .  | RSICHYQQQRQPI            | SHIHALSPSNF      | ANYGLTNNPAGNY      |                          | LRIRFCN             |                              | 298  |     |
| BpWRKY16 | -            | PEQTH. TEDLPTPTKEEQQETAE        | EBBEKQNDPIM              | STTEKD           | HDFHYIQSPIR        | CLDIIVNQGBEDP            | FTVHLEKTHEIM        | G                            | 204  |     |
| BpWRKY19 | -            | L                               |                          |                  |                    |                          |                     |                              | 167  |     |
| BpWRKY20 | -            | G                               |                          | LK. CT           |                    |                          |                     |                              | 138  |     |
| BpWRKY21 | -            | YNQTPLMVP. GWT                  | LQASSV                   |                  |                    |                          |                     |                              | 173  |     |
| BpWRKY22 | -            | L                               |                          |                  |                    |                          |                     |                              | 182  |     |
| BpWRKY25 | EKL          | PQET. RNFAARLT                  | VKTEY. EAREDDIF          | PSFSIGSEN        | BEANIFCESML        | ENNFMAS. SPTFLS          | PATS. SNMF. MSPCQ   |                              | 277  |     |
| BpWRKY26 | -            | ETLTPLLKMQQLSRF                 |                          |                  |                    |                          |                     |                              | 185  |     |
| BpWRKY27 | -            | KKLNSTKPS. PATSMEDL. VPQSTTT    |                          | DSKEREDLVE       |                    | DEEDEFGLSDV              | AMSDD               | FFVGL                        | 308  |     |
| BpWRKY28 | -            | RPK- PVC. SNQE. QEYVLSQR.       |                          | NPMKPNK          | LKLP               | TKAQQLRL                 | RY                  |                              | 243  |     |
| BpWRKY29 | -            | IKKHKNSTI. RAQAHE. QQTQDAQES.   |                          | AYLTGTPVLS       | P                  | EDQGGIIM. SQGLLE         | DVVPMMIRNP          |                              | 251  |     |
| BpWRKY30 | -            | NGAAANSKNKPTSPKEEQKDQSSNE       | ANVSPSTTT                | STACVKEEIDHDHQDI | EKMDDAD. ISTGTDHGF | PPYRAMP. G               |                     |                              | 383  |     |
| BpWRKY31 | -            | ASSAHSGT. . ANQYDLLTQVFGDRS     |                          |                  |                    | TYNDHIDN                 |                     |                              | 156  |     |
| BpWRKY32 | -            | KQLDQETTS. AVLADL               | GDESLML                  | SDEFGWFS         | DMETTSS            | TVLESPIFADSSV            | GGDADLAMFFPMREE     | DESLYADLGELPE                | 252  |     |
| BpWRKY33 | TISASAPF     | PTVTL                           | DLTHS. NPLQFQRT. AQFPVHF | AGQPQSGSVPT      | QPLPG              | QFGQ. . YNQS             | KFAGL. LSQD         | MGPSQLA                      | 506  |     |
| BpWRKY35 | NIFNPP. NSGL | FLPM. KY. STVAT. STAPHPTITL     | DLT                      |                  |                    | HIPQRNMQSLQRRAL          | DPPLFMSS            |                              | 376  |     |
| BpWRKY37 | -            | G- . . VISHETFAGQFH. P. SQFYYP  |                          | TGAPLP           | QENPFITQSQ         | IPG                      | EAGDESSRAMP         | GTP                          | 279  |     |
| BpWRKY39 | SFSTSN. H    | PTVTL                           | DLTT. . STSSSF           | ERFSSTPRYP       | STRLN              |                          | FSSSLDQPNLTQNH      | RGYGYGYSNYGY                 | 416  |     |
| BpWRKY40 | -            | DNFEHILTQMQLFS. Y               |                          |                  |                    |                          |                     |                              | 178  |     |
| BpWRKY42 | M            | INPSSHPSNLTITINPNDPSK           | GIVL                     | DLTTN            | PYDHHHPP           | QFMPAG                   | PSSYS               | SSSSSS. H. FA. WMHGKQSYHN    | NATN | 402 |
| BpWRKY43 | -            | DNFEHILTSQMQLYAPF               |                          |                  |                    |                          |                     |                              | 174  |     |
| BpWRKY44 | PQSATSLSP    | PTPLTVQTD                       | EEATIA                   | NKSN             | EEENKIMIDGN        | DKESEEMADDY              | DEDDDEI. IPNMAMT    | QDIFLGLQEL                   | 263  |     |
| BpWRKY45 | S- SPAPLC    | PTVTL                           | DLTTS. FSSST- LFN        | NRLPSSF          | ASNP               |                          | FPSKLSFSSLESN       | ILPTTWGAGYPSYA               | 424  |     |
| BpWRKY48 | -            | VNSE. TTIP. KQDCAVS             |                          | SSAAT            |                    | IKQESKEEALS              |                     | DLTDNLPSL. -IHLWDLN. F. LSGP | 270  |     |
| BpWRKY49 | -            | AAATDMTTQPRSS. . I              | LSSWLSMBYLG              |                  |                    | PRGGSGSSSGIV. S. SGGGG   | GDGAGP. TTRTG       |                              | 318  |     |
| BpWRKY50 | -            | GNAA. MLSP. LLASA. GG- P. TFPQA |                          | LFSQLLPT         | NNNQAVDPN          | YMFYGNLMT                | QHPQQQQ             | QQLQ                         | 274  |     |
| BpWRKY52 | TISASAPF     | PTVTL                           | DLTQS. NPLQFQRP          | STQFQIPFANP      |                    | SAASLLP                  | QIFGQ. . QNQS       | KFSGL. MSQDMDQG              | 508  |     |
| BpWRKY53 | -            | PISHCYIGFNTI. QPITIPKAT         | NPIPNPICQ                |                  |                    | LRRLIAASN                | IWSPSPKPIKFS        | GL. MSQDMDQG                 | 448  |     |
| BpWRKY59 | -            | KIFHILWKPFVGSN                  | LRSYYRCTINN              |                  |                    | CRVKRVER                 | RLSEDCRMVITTY. GRHN |                              | 283  |     |
| BpWRKY60 |              |                                 |                          |                  |                    |                          |                     |                              | 167  |     |
| BpWRKY64 | -            | IKKPKKSTI. QAQAHE. QQTQDAQES.   |                          |                  | AYLTGTPVLS         | P- LDR                   | EGIIM. SQGLLE       | DVVPMMIRNP                   | 256  |     |

|          |     |     |                |                                  |                                |                                          |                  |                                          |     |
|----------|-----|-----|----------------|----------------------------------|--------------------------------|------------------------------------------|------------------|------------------------------------------|-----|
|          | 650 | 660 | 670            | 680                              | 690                            | 700                                      | 710              | 720                                      |     |
| BpWRKY1  | --- |     | PLQHFLVQ       |                                  | QMASSLTRDPNFTAALAAAT           | ISGRIL                                   | DL               | STTLN                                    | 317 |
| BpWRKY2  | --- |     | . F. N. VED    | NHRN                             | LAEY. A. . K. S. . . . . VASS. | TQQPKVSKI                                |                  |                                          | 300 |
| BpWRKY5  | --- |     |                | K                                |                                |                                          |                  |                                          | 272 |
| BpWRKY8  | --- |     | FAEP           | AVD                              | EWFL                           | DQLLDNCPL                                | W                | IDKST. VGDDHC                            | 304 |
| BpWRKY10 | --- |     |                |                                  |                                |                                          |                  |                                          | 133 |
| BpWRKY11 | --- |     | QVIPYDR        |                                  | NQNMGRQ                        | SN                                       |                  | YATAAATKAI. A. . S. QS. . . . LTTI. GTGN | 443 |
| BpWRKY12 | --- |     |                | FYNMTVL                          | SSPV                           | ESDDNGVLVGS                              | VDHFADDDLM. AFSF |                                          | 307 |
| BpWRKY13 | --- |     | LLATNRI. SPPSL | LDAVSSATAAI. AN. . . . . ASI. DN |                                |                                          |                  |                                          | 437 |
| BpWRKY14 | --- |     |                | NKQAVD                           | VGQ. QPSM                      | HTLSAAIAA. . . . . V. TI. GAPARS. DGNGAT |                  |                                          | 573 |

BpWRKY15  
 BpWRKY16  
 BpWRKY19  
 BpWRKY20  
 BpWRKY21  
 BpWRKY22  
 BpWRKY25  
 BpWRKY26  
 BpWRKY27  
 BpWRKY28  
 BpWRKY29  
 BpWRKY30  
 BpWRKY31  
 BpWRKY32  
 BpWRKY33  
 BpWRKY35  
 BpWRKY37  
 BpWRKY39  
 BpWRKY40  
 BpWRKY42  
 BpWRKY43  
 BpWRKY44  
 BpWRKY45  
 BpWRKY48  
 BpWRKY49  
 BpWRKY50  
 BpWRKY52  
 BpWRKY53  
 BpWRKY59  
 BpWRKY60  
 BpWRKY64

---TGSA. TRDHCLIQDIVP. HMLKEE  
 ---L. LDEEPLCYSQLMNFSTPFSEED. FDE. EELPTSSST. FMRSNFSDERI  
 ---SYGLGYNVQTSESDLTDIVSAPT. V. NS. ILNLDFS LDKVDH. DPNFPFD. NPDFFY  
 ---FAGP---AAG. CFPDHFPA TFAL. WV. NN. G  
 ---PNNTFNSSSCSYSRSPPTSPSSLSWCTSYS. TCFD. GI  
 ---TSNC AQSSDQDFFADLGEIEADPLDLLFTQ. FSGDDDHHDQEKD. SKALMDPF  
 CSVVFRWRG---TRSRDL. TRVFGPHYPPLRLSTVKVVPFLSFV. CETANMVVEQLVKSLTPLIFF  
 HHASSHP---PLQQPQQQ. QPSLA. DTVSAATAAT. A. . . . . SI. SGAHP. ---NNT  
 ---MLPTLFPAEKDRHRSMDVMVSAAT. H. . . . . A. SIMRA. QSNSHGGHDT  
 ---QFPSNEGLLGDIVPPNM. NR  
 NSNTSTTGNQPFQEHL YQANYMNNQNNGFHHQQPALEENIVAATKAIASN. K. QSV. . . . LTSYVG. RENQGVGDQIS  
 ---NLFPSPRRVDEENKSLAENVTAMAS. K. RV. V. . . . TSLMNKE. SHTGPHVGT  
 ---YSSPGGESGDNFSDGGRANS GSSWPPCGSS. AIATTCAAMNGC  
 VPFNKTN---ASSMNLFSYLEKT. HQASSQ. S. ---LTESLTKAAT. . . . QS. I. T. SIVGGGA. HDSQGGGEP  
 ---IGSDNGDVVSTMYSCDTASLSLELDIDFDGDF. EFL  
 ---KEVEFPVVDLADA. FN. GSSSS. ISMDFLFHP. EDKWETGDKQN  
 ---. PHDYGLLQDLVPPFSNKRQP  
 ---QGQQLG. QNSLS. DTVSAATAAIAA. . . . . TSI. GSGAHT. NICGNA  
 ---QGQQLG. QNSLS. DTVSAATAAIAA. . . . . TSI. GSGAHT. NICGNA  
 ---HSPCDD. NSSBHECFTSF  
 ---PNNTFNS. SCSYSRSPPTSPSSLSWCTSYSTTCFD. GI

322  
 256  
 167  
 138  
 173  
 182  
 335  
 185  
 337  
 243  
 290  
 435  
 156  
 318  
 564  
 432  
 299  
 496  
 178  
 458  
 174  
 307  
 494  
 307  
 362  
 295  
 562  
 502  
 301  
 167  
 293

|          |       |     |
|----------|-------|-----|
| BpWRKY59 | ----- | 301 |
| BpWRKY60 | ----- | 167 |
| BpWRKY64 | ----- | 293 |

|          |     |     |
|----------|-----|-----|
|          | ... |     |
| BpWRKY1  | --- | 317 |
| BpWRKY2  | --- | 300 |
| BpWRKY5  | --- | 272 |
| BpWRKY8  | --- | 304 |
| BpWRKY10 | --- | 133 |
| BpWRKY11 | KEF | 494 |
| BpWRKY12 | --- | 307 |
| BpWRKY13 | --- | 451 |
| BpWRKY14 | --- | 594 |
| BpWRKY15 | --- | 322 |
| BpWRKY16 | --- | 261 |
| BpWRKY19 | --- | 167 |
| BpWRKY20 | --- | 138 |
| BpWRKY21 | --- | 173 |
| BpWRKY22 | --- | 182 |
| BpWRKY25 | --- | 335 |
| BpWRKY26 | --- | 185 |
| BpWRKY27 | --- | 337 |
| BpWRKY28 | --- | 243 |
| BpWRKY29 | --- | 290 |
| BpWRKY30 | --- | 445 |
| BpWRKY31 | --- | 156 |
| BpWRKY32 | --- | 367 |
| BpWRKY33 | --- | 581 |
| BpWRKY35 | --- | 452 |
| BpWRKY37 | --- | 299 |
| BpWRKY39 | L-- | 576 |
| BpWRKY40 | --- | 178 |
| BpWRKY42 | --- | 491 |
| BpWRKY43 | --- | 174 |
| BpWRKY44 | --- | 307 |
| BpWRKY45 | --- | 556 |
| BpWRKY48 | --- | 307 |
| BpWRKY49 | --- | 362 |
| BpWRKY50 | --- | 295 |
| BpWRKY52 | --- | 583 |
| BpWRKY53 | --- | 523 |
| BpWRKY59 | --- | 301 |
| BpWRKY60 | --- | 167 |
| BpWRKY64 | --- | 293 |
