# Supplementary material for: Genome-Wide Identification and Characterization of WRKY Transcription Factors in Betula platyphylla Suk. and Their Responses to Abiotic Stresses
Source: MDPI journal article supplement (doi:10.3390/ijms241915000), 2023-10-08
Supplement: s1 [file s1]

A.

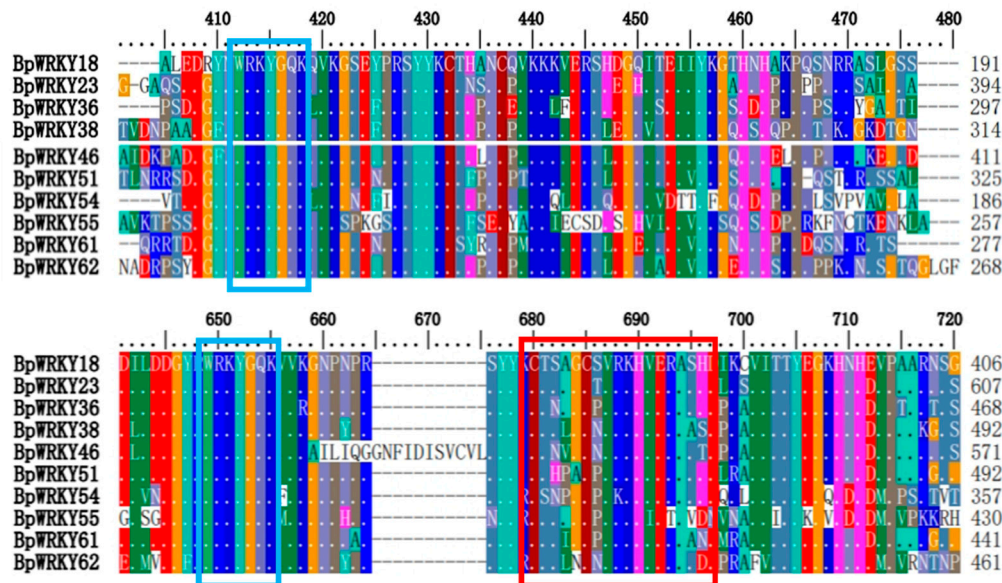

B.

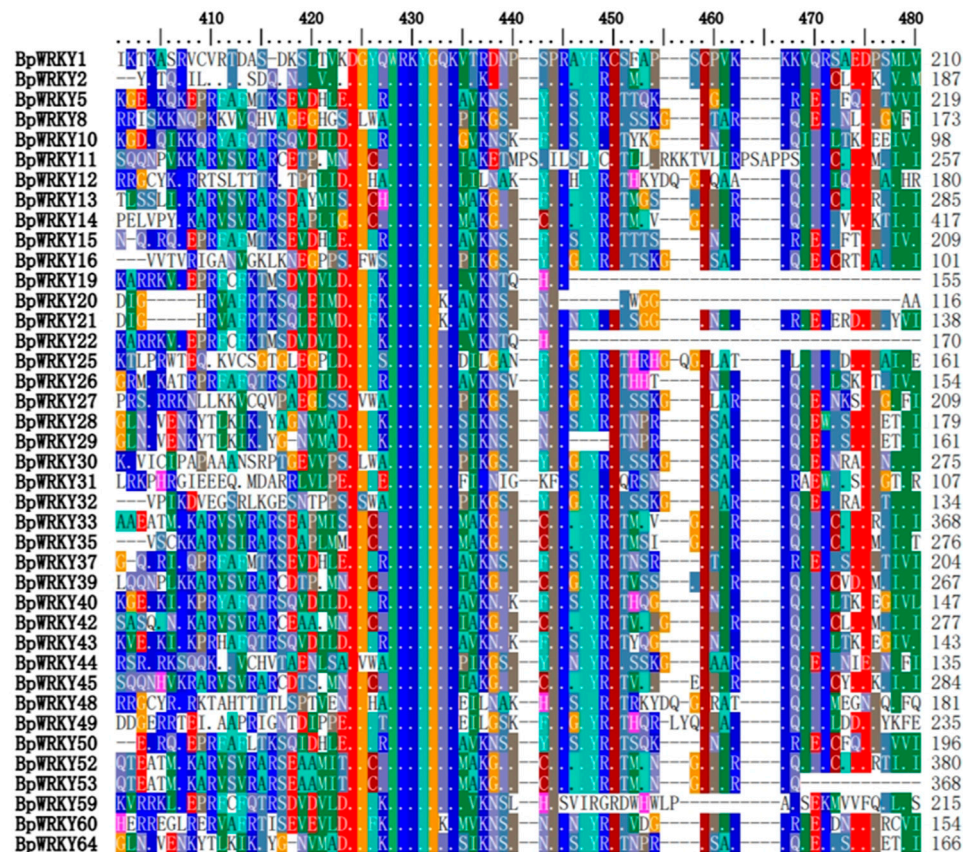

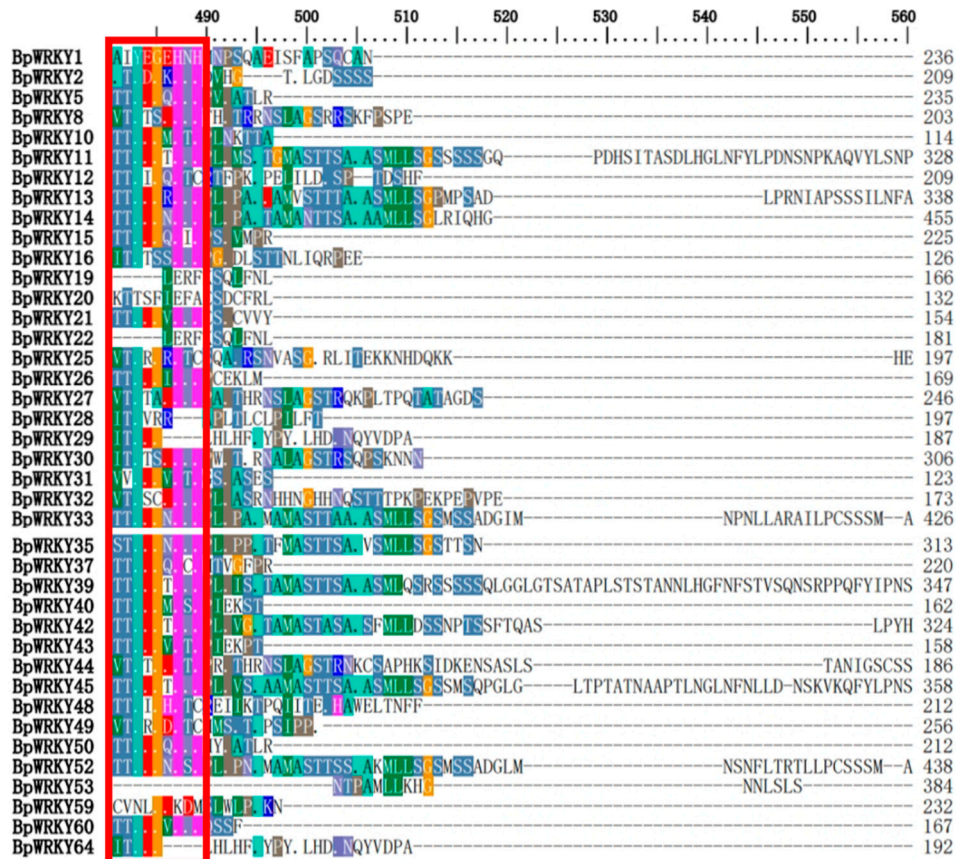

C.

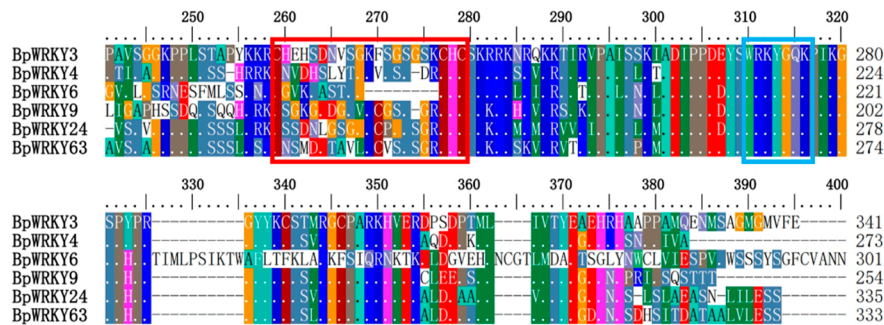

D.

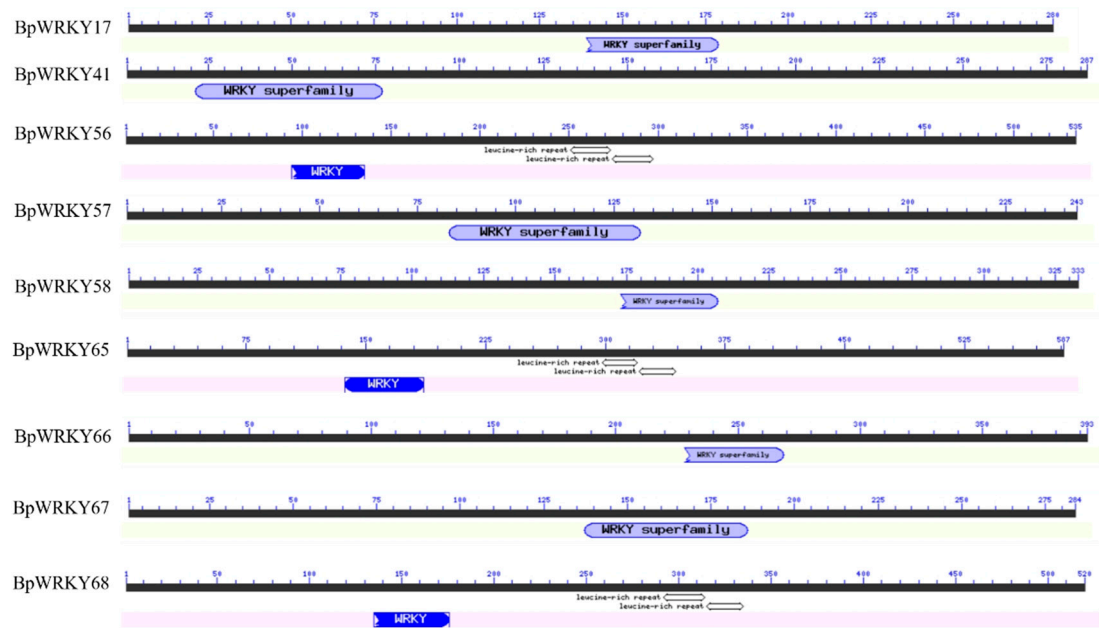

**Figure S2.** Schematic diagram of the domains of BpWRKYs protein. A: Class I; B: Class II; C: Class III; D: Class IV. The red box indicates zinc-finger domain, and the blue box indicates WRKY domain.
