# Supplementary figures and images for: Genome-Wide Identification and Characterization of WRKY Transcription Factors in Betula platyphylla Suk. and Their Responses to Abiotic Stresses
Source: MDPI journal article supplement (doi:10.3390/ijms241915000), 2023-10-08

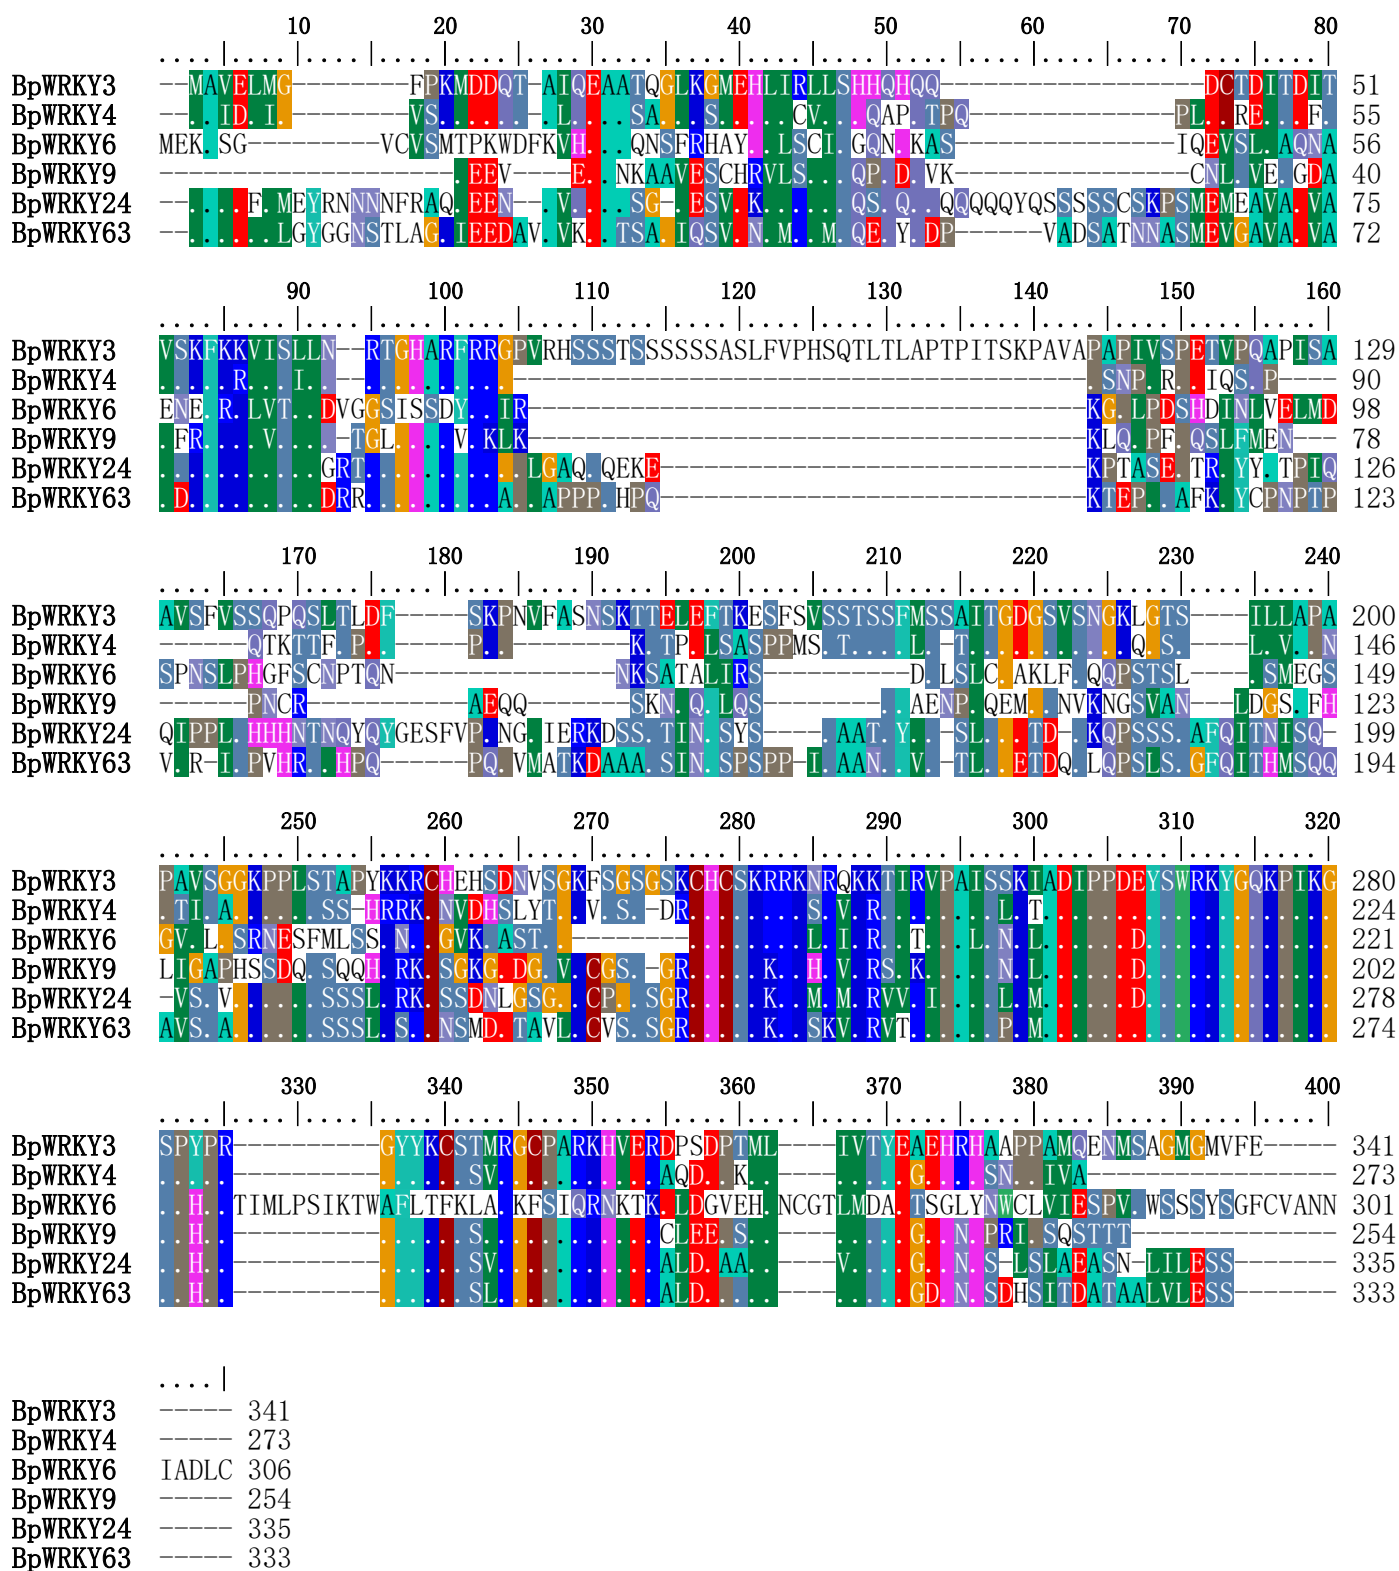

Supplement: s1 [file s1]
